# Supplementary figures and images for: Marine Sponges as a Drug Treasure
Source: PubMed Central journal article supplement — Biomol Ther (Seoul). 2016 Jul 1;24(4):347–62. doi: 10.4062/biomolther.2016.067 (PMC4930278; doi:10.4062/biomolther.2016.067), 2016-07-01

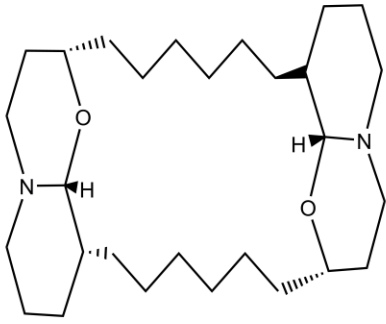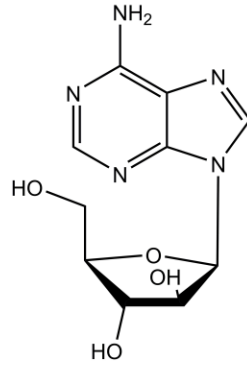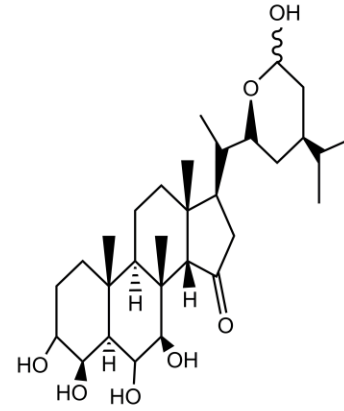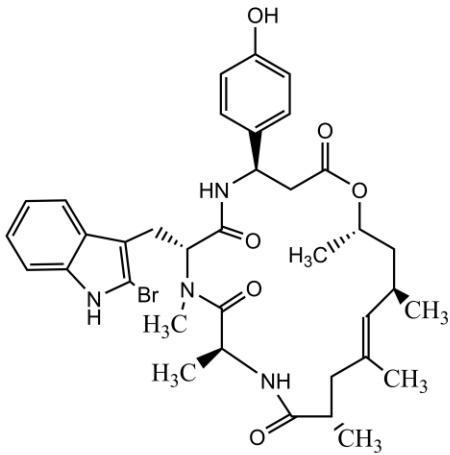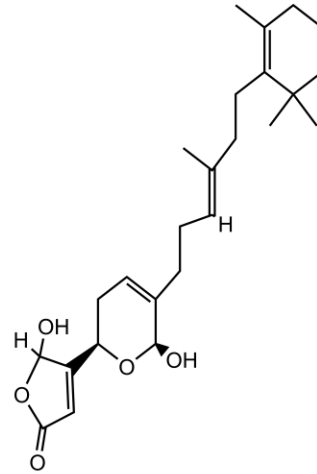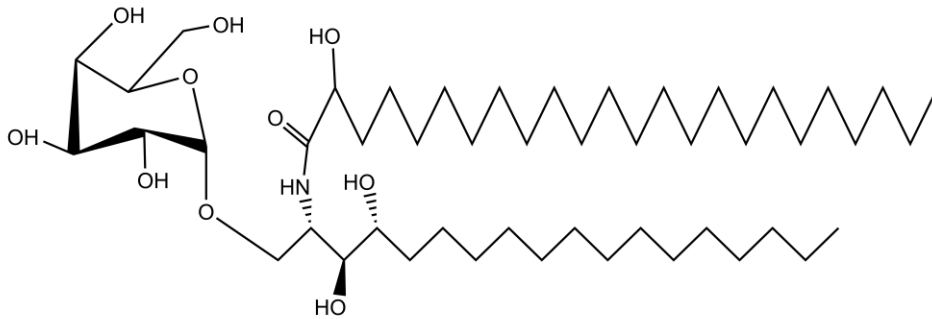

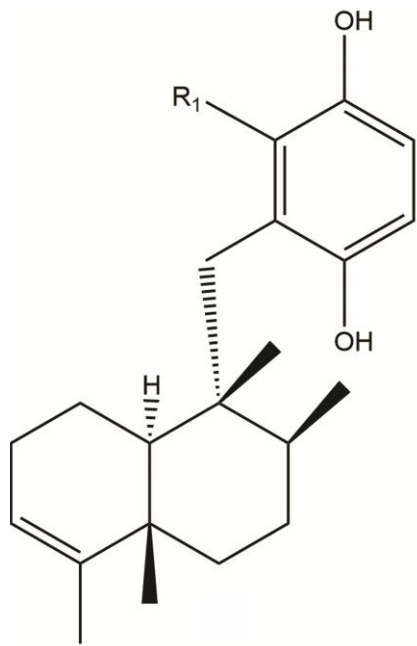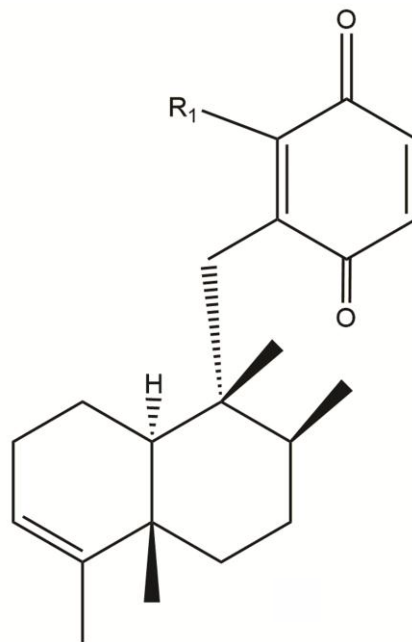

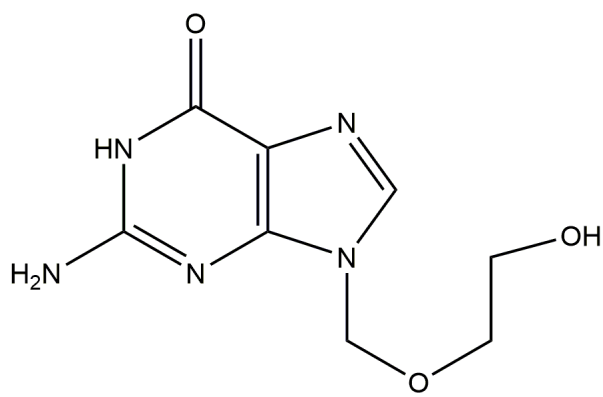

Acyclovir

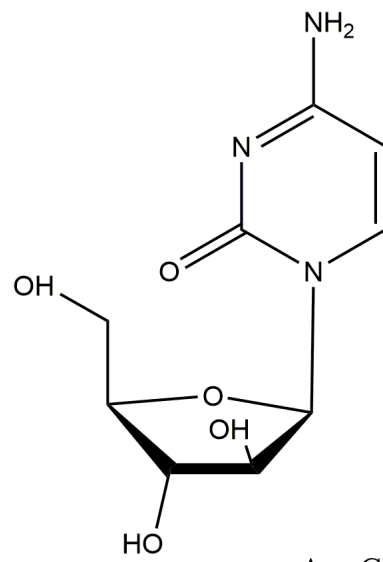

Ara-C

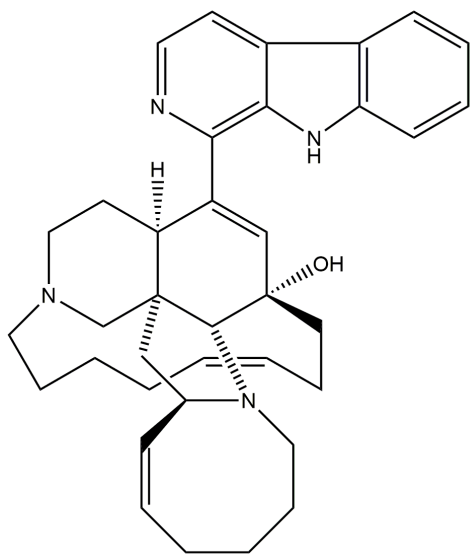

Manzamine A

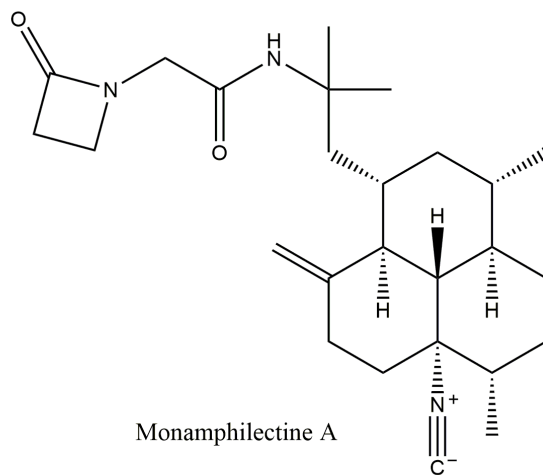

Monamphilectine A

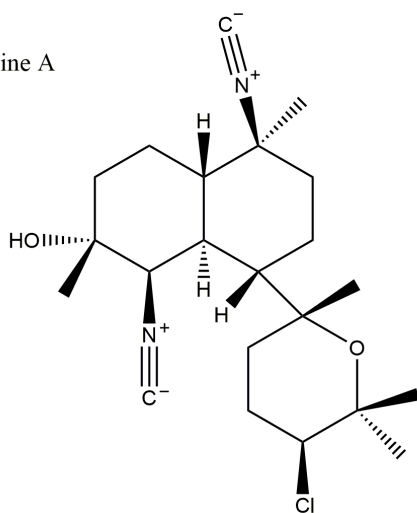

Kalihinol A

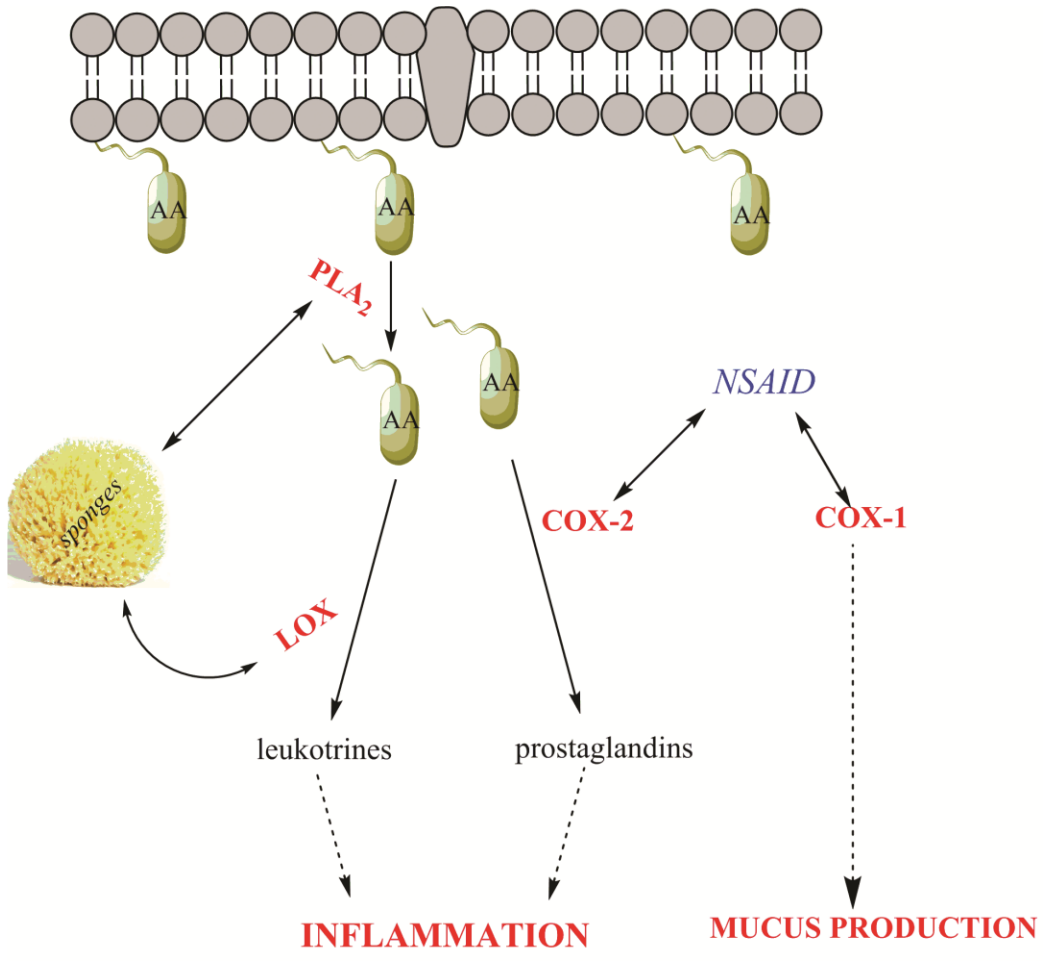

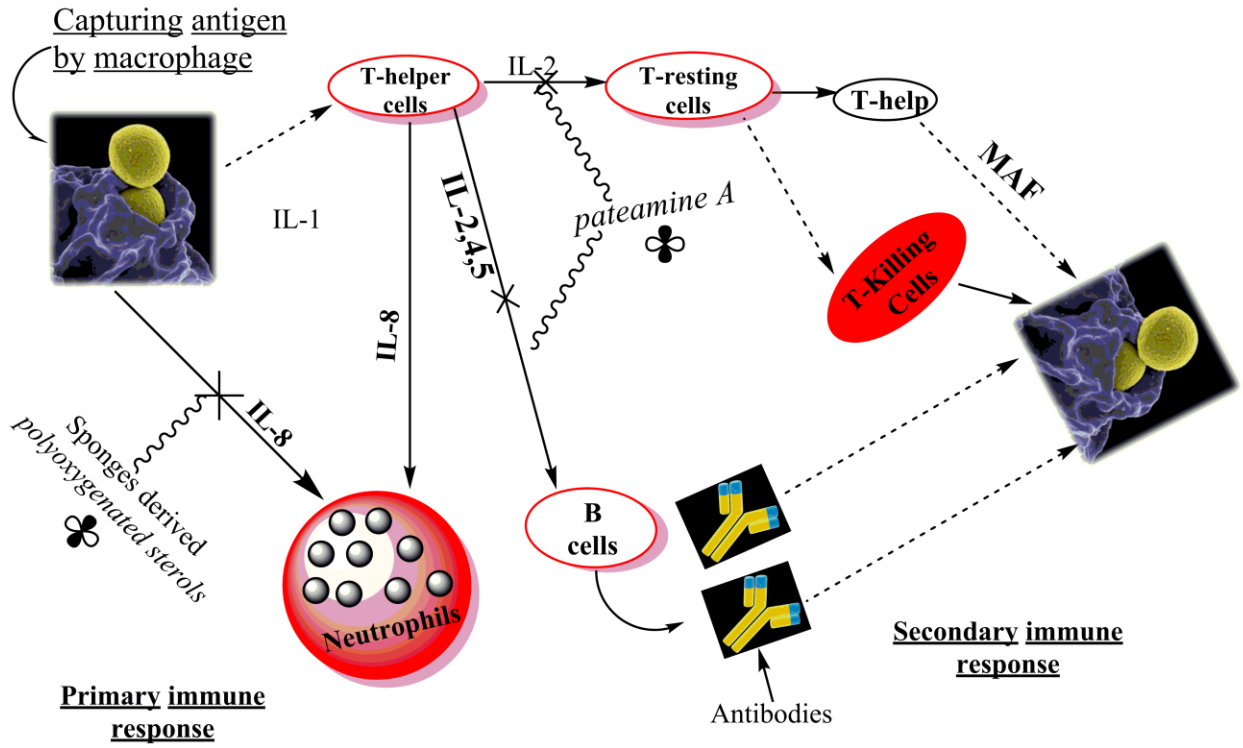

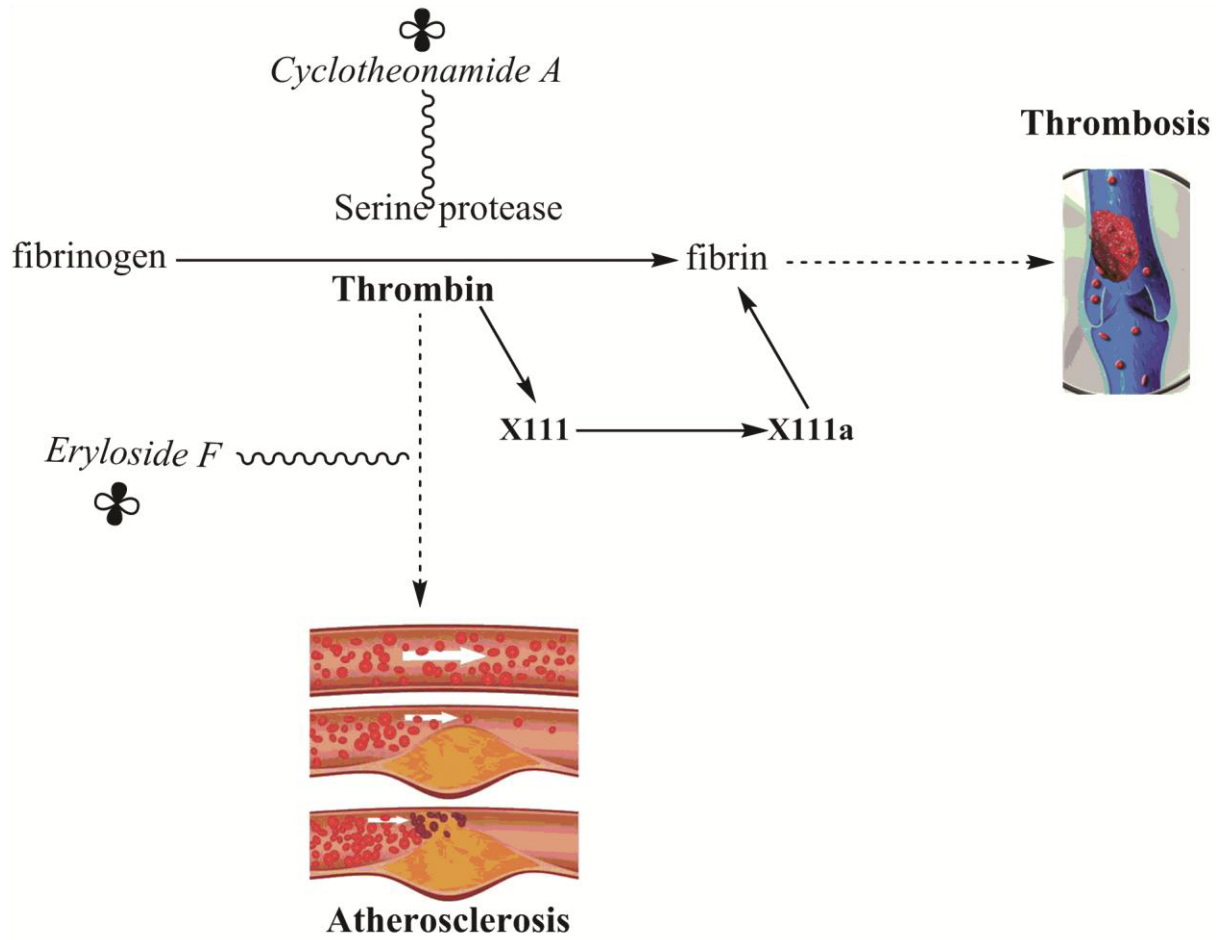

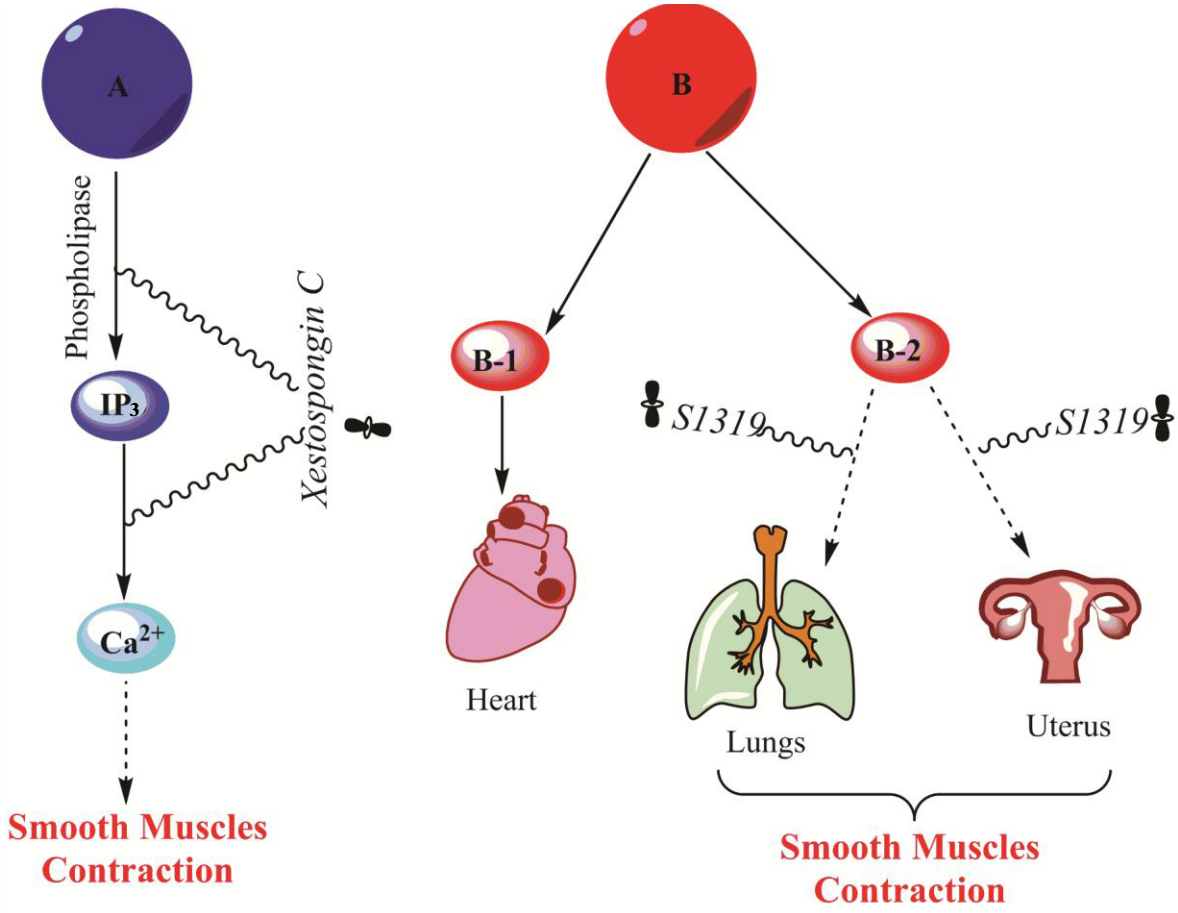

Supplement: BT-24-347_supple.pdf [file BT-24-347_supple.pdf]
